# Supplementary material for: Primary Care Professionals’ Self-Efficacy Surrounding Advance Care Planning and Its Link to Sociodemographics, Background and Perceptions: A Cross-Sectional Study
Source: MDPI journal article supplement (doi:10.3390/ijerph18179034), 2021-08-27
Supplement: s1 [file s1]

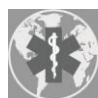

## Supplementary

**Table S1.** Supplemental table. Multivariate analysis. Logistic regression model (dependent variable ACP-SEs<sup>1</sup> >75 points).

|                                                                                              | OR   | IC95%       | <i>p-value</i>   |
|----------------------------------------------------------------------------------------------|------|-------------|------------------|
| (Intercept)                                                                                  | 0.06 | 0.03 – 0.11 | <b>&lt;0.001</b> |
| Have you participated in an ACP process with a patient? (Yes)                                | 1.70 | 1.02 – 2.84 | <b>0.043</b>     |
| The ACP process contributes to improving the patients' quality of life (>8 points)           | 1.93 | 1.16 – 3.25 | <b>0.013</b>     |
| ACP facilitates knowledge of patients' values and preferences (>8 points)                    | 2.24 | 1.12 – 4.76 | <b>0.028</b>     |
| Do you consider yourself to be sufficiently trained to carry out ACP processes? (≥ 8 points) | 3.98 | 2.37 – 6.74 | <b>&lt;0.001</b> |

<sup>1</sup> ACP-SEs= Advance Care Planning Self Efficacy Spanish; *p*-values < 0.05; Statistically significant differences have been marked in bold

**Table S2.** Supplemental table. Statistical probability of showing a condition and scoring the ACP -SEs<sup>1</sup> >75 points.

|                                                                                                                                                                                                                                                                  | Probability % |
|------------------------------------------------------------------------------------------------------------------------------------------------------------------------------------------------------------------------------------------------------------------|---------------|
| None condition                                                                                                                                                                                                                                                   | 5.53%         |
| Has participated in an ACP process                                                                                                                                                                                                                               | 9.03%         |
| ACP contributes to improving patients' quality of life (>8 points)                                                                                                                                                                                               | 10.14%        |
| ACP facilitates knowledge of patients' preferences and values (>8 points)                                                                                                                                                                                        | 11.60%        |
| Considers him/herself to be sufficiently trained to carry out ACP processes (>8 points)                                                                                                                                                                          | 18.89%        |
| Having participated in an ACP process + ACP contributes to improving patients' quality of life >8 points + ACP facilitates knowledge of preferences and values >8 points + Considers him/herself to be sufficiently trained to carry out ACP processes >8 points | 68.00%        |

<sup>1</sup> ACP-SEs= Advance Care Planning Self Efficacy Spanish.
